# Supplementary material for: Cultural Adaptation of the World Health Organization’s iSupport Dementia Program for Family Carers of People Living with Dementia in Vietnam
Source: Research Square preprint supplement (doi:10.21203/rs.3.rs-6988335/v1), 2025-08-01
Supplement: Supplementary file 1 [file 2f366d7eb818c4d37b1d2607.docx]

Table S1. The interview guide for FGDs

| **Part one: About translation of the iSupport content** | |
| --- | --- |
| 1 | How appropriate is the translated content to local language and culture? |
| 2 | What needs to be changed for better expression and understanding? |
| 3 | Please share your ideas for improvement of the iSupport content, and any expectations/supports needed for your dementia caring. |
| **Part two: About the implementation of the iSupport program (Website, Virtual Assistant)** | |
| 1  2 | How likely are you to use the translated iSupport content in the future?  What is the content that would be easier to understand if it is illustrated by a video? |
| 3 | If there is an iSupport Virtual Assistant (a mobile application and a website of the iSupport in your language), will you use it? |
| 3.1 | What are your expectations for the iSupport website? (Prompts: Online course, forum, peer support group, useful links …) |
| 3.2 | What are your expectations for the iSupport mobile application? (Suggesting lessons/actions for specific situations, reminding messages, relaxing…) |
| 4 | On demonstrating the situations, which format of video you prefer: animation or live-action video? And what considerations should be taken into account on producing such videos? |
| 5 | How much time will you be able to spend on the iSupport program (online course/ videos/other functions of the iSupport Virtual Assistant) per week)? |
| 6 | What would be the barriers to and facilitators of using the iSupport Virtual Assistant? |
