# Supplementary material for: Cultural Adaptation of the World Health Organization’s iSupport Dementia Program for Family Carers of People Living with Dementia in Vietnam
Source: Research Square preprint supplement (doi:10.21203/rs.3.rs-6988335/v1), 2025-08-01
Supplement: Supplementary file 2 [file c85974aef63b06f1bf294cdd.docx]

Table S2. The themes and sub-themes that emerged from the FGDs with codes

| **Themes** | **Sub-themes** | **Codes** |
| --- | --- | --- |
| **Empowering Carers Through Knowledge and Practical Guidance** | Needed program  Valuable tool | - Provide official, accurate information about dementia. - Offer practical strategies to manage mental and behavioral disorders. |
| **The Need for Simplification and adaptation of iSupport** | Simplification of language | - Avoid jargon |
| - Use shorter sentences and simpler language. |
| Simplification of instruction | - Add correct answer |
| - Dehydration prevention |
| Adaptation of context | - Car replaced by motorbike |
| - Add relaxation activities |
| - Getting lost |
| **Opinion on the Implementation of the iSupport program (Website, Virtual Assistant)** | iSupport content delivery | - Video, voice-over should be use for guidelines |
| Videos format | - Animation - Real actors |
| Time spent a week on program | - Time |
| Facilitators and barriers in using the program | - Facilitator - Barriers |
| Suggestions for improving iSupport content | - Ideas - Expectation |
